# Supplementary material
Source: PubMed Central journal article supplement (PMC553290)
Supplement: pnas_102_10_3805__2.pdf [file pnas_102_10_3805__2.pdf]

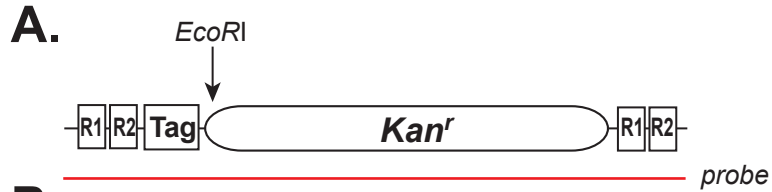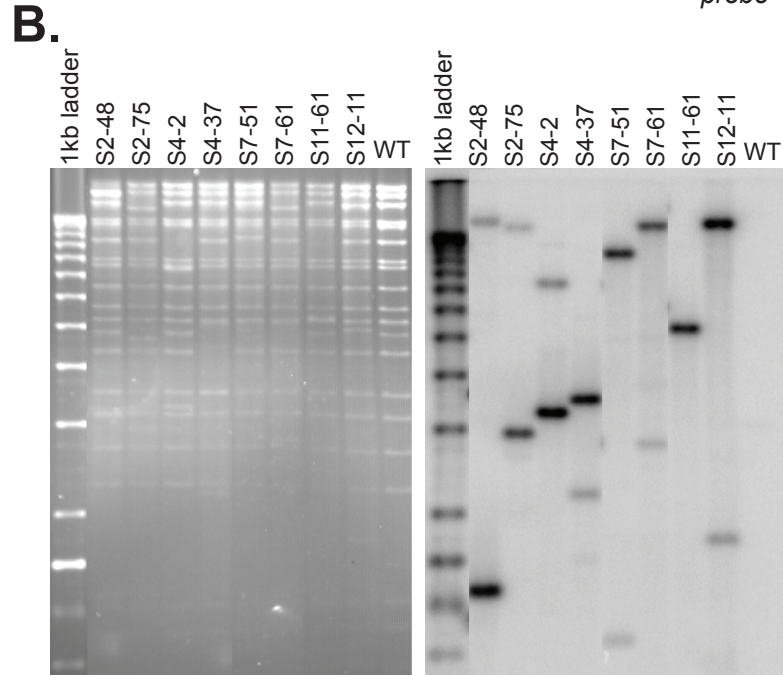

| STM mutant | ORF   | Orientation of Tn | Location of Tn | missing EcoRI fragment | 2 EcoRI fragments with Tn |        |
|------------|-------|-------------------|----------------|------------------------|---------------------------|--------|
| 2-48       | ORF60 | F                 | 80360          | 14,937                 | 14,852                    | 1,384  |
| 2-75       | ORF59 | F                 | 78836          | 14,937                 | 13,328                    | 2,908  |
| 4-2        | ORF37 | R                 | 54223          | 9,215                  | 3,258                     | 7,256  |
| 4-37       | ORF61 | F                 | 82619          | 4,352                  | 2,174                     | 3,477  |
| 7-51       | ORF36 | F                 | 52925          | 9,215                  | 1,060                     | 9,454  |
| 7-61       | ORF58 | R                 | 78084          | 14,937                 | 13,476                    | 2,760  |
| 11-61      | ORF40 | F                 | 57084          | 9,215                  | 5,219                     | 5,295  |
| 12-11      | ORF49 | F                 | 67320          | 14,937                 | 1,812                     | 14,424 |
