# Supplementary material
Source: PubMed Central journal article supplement (PMC553290)
Supplement: pnas_102_10_3805__6.pdf [file pnas_102_10_3805__6.pdf]

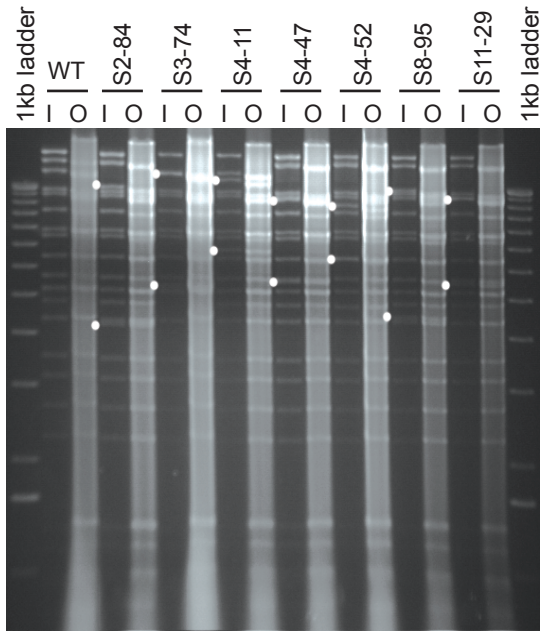

| STM mutant | ORF   | Orientation of Tn | Location of Tn | missing EcoRI fragment | 2 EcoRI fragments with Tn |        |
|------------|-------|-------------------|----------------|------------------------|---------------------------|--------|
| 2-84       | M7    | F                 | 69767          | 14,937                 | 4,259                     | 11,977 |
| 3-74       | M4    | R                 | 9158           | 18,836                 | 14,824                    | 5,311  |
| 4-11       | M4    | F                 | 8641           | 18,836                 | 13,407                    | 6,728  |
| 4-47       | M7    | R                 | 70096          | 14,937                 | 5,488                     | 10,748 |
| 4-52       | ORF54 | F                 | 71898          | 14,937                 | 6,390                     | 9,846  |
| 8-95       | M7    | F                 | 69957          | 14,937                 | 4,449                     | 11,787 |
| 11-29      | M7    | R                 | 70046          | 14,937                 | 5,438                     | 10,798 |
