# Supplementary material
Source: PubMed Central journal article supplement (PMC553290)

**A.**

## Plaque Assays

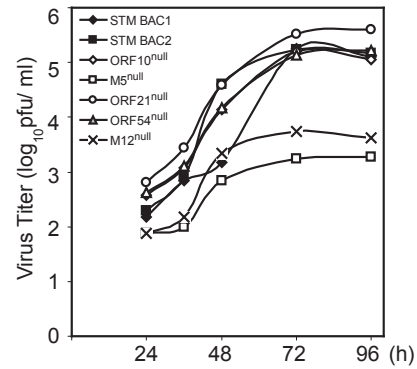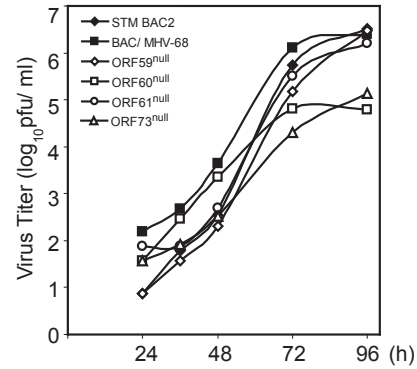**B.**

## Real-time PCR

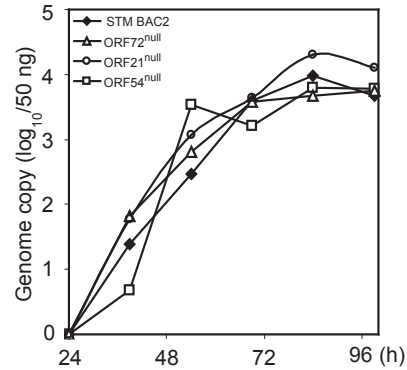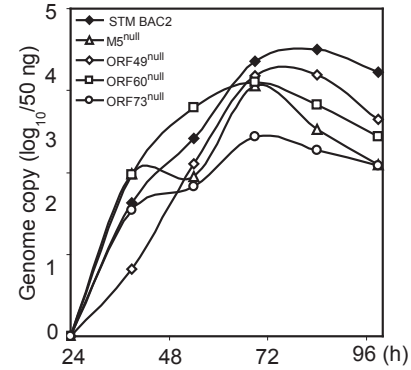

Supplement: pnas_102_10_3805__4.pdf [file pnas_102_10_3805__4.pdf]

# A. Tn insertion in M7<sup>null</sup> mutants

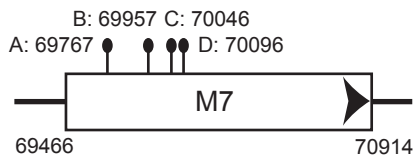

# B.

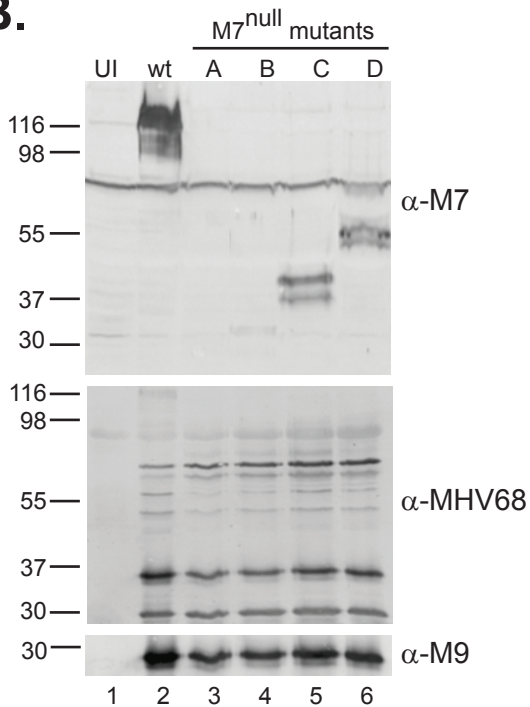

Supplement: pnas_102_10_3805__5.pdf [file pnas_102_10_3805__5.pdf]

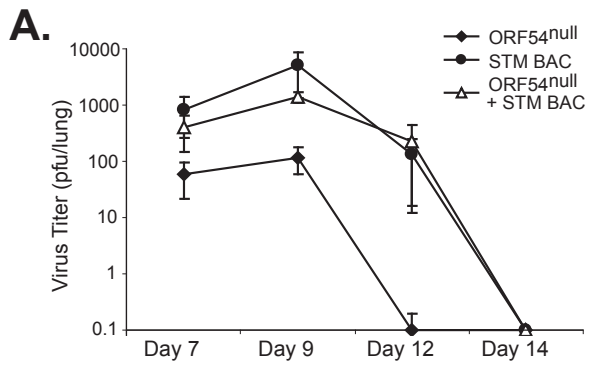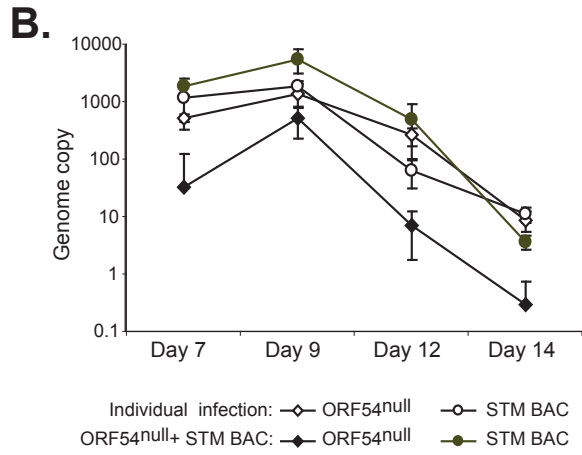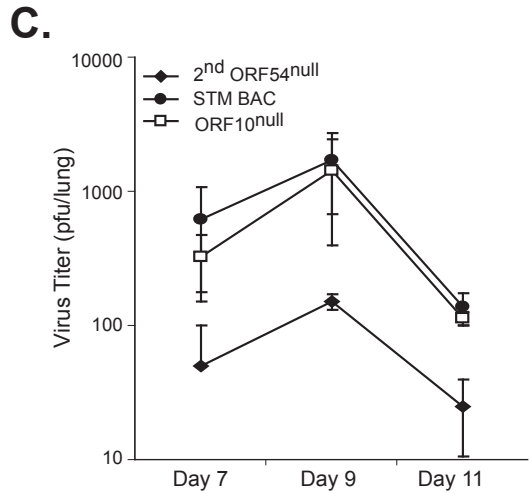

Supplement: pnas_102_10_3805__7.pdf [file pnas_102_10_3805__7.pdf]
